# Supplementary material
Source: publisher site journal article supplement (https://www.dovepress.com/article/111914)
Supplement: Supplementary file 1 [file get_supplementary_file.php]

## Supplementary material

### Development of novel HER2 inhibitors against gastric cancer derived from flavonoid source of *Syzygium alternifolium* through molecular dynamics and pharmacophore based screening

Tirumalasetty Muni Chandra Babu<sup>1</sup>, Aluru Rammohan<sup>2</sup>, Baki Vijaya Bhaskar<sup>1</sup>, Savita Devi<sup>3</sup>, Duvvuru Gunasekar<sup>2</sup>, Wudayagiri Rajendra<sup>1\*</sup>

<sup>1</sup>Bioinformatics Center, Division of Molecular Biology, Department of Zoology, Sri Venkateswara University, Tirupati -517 502, Andhra Pradesh, India.

<sup>2</sup>Natural Products Division, Department of Chemistry, Sri Venkateswara University, Tirupati -517 502, Andhra Pradesh, India.

<sup>3</sup>Pathogen Biology Laboratory, Department of Biotechnology and Bioinformatics, School of Life Sciences, University of Hyderabad, Hyderabad, India.

#### \* Corresponding Author

Prof. Wudayagiri Rajendra  
Division of Molecular Biology  
Department of Zoology,  
Sri Venkateswara University,  
Tirupati -517502.  
Email: [rajendraw2k@yahoo.co.in](mailto:rajendraw2k@yahoo.co.in)

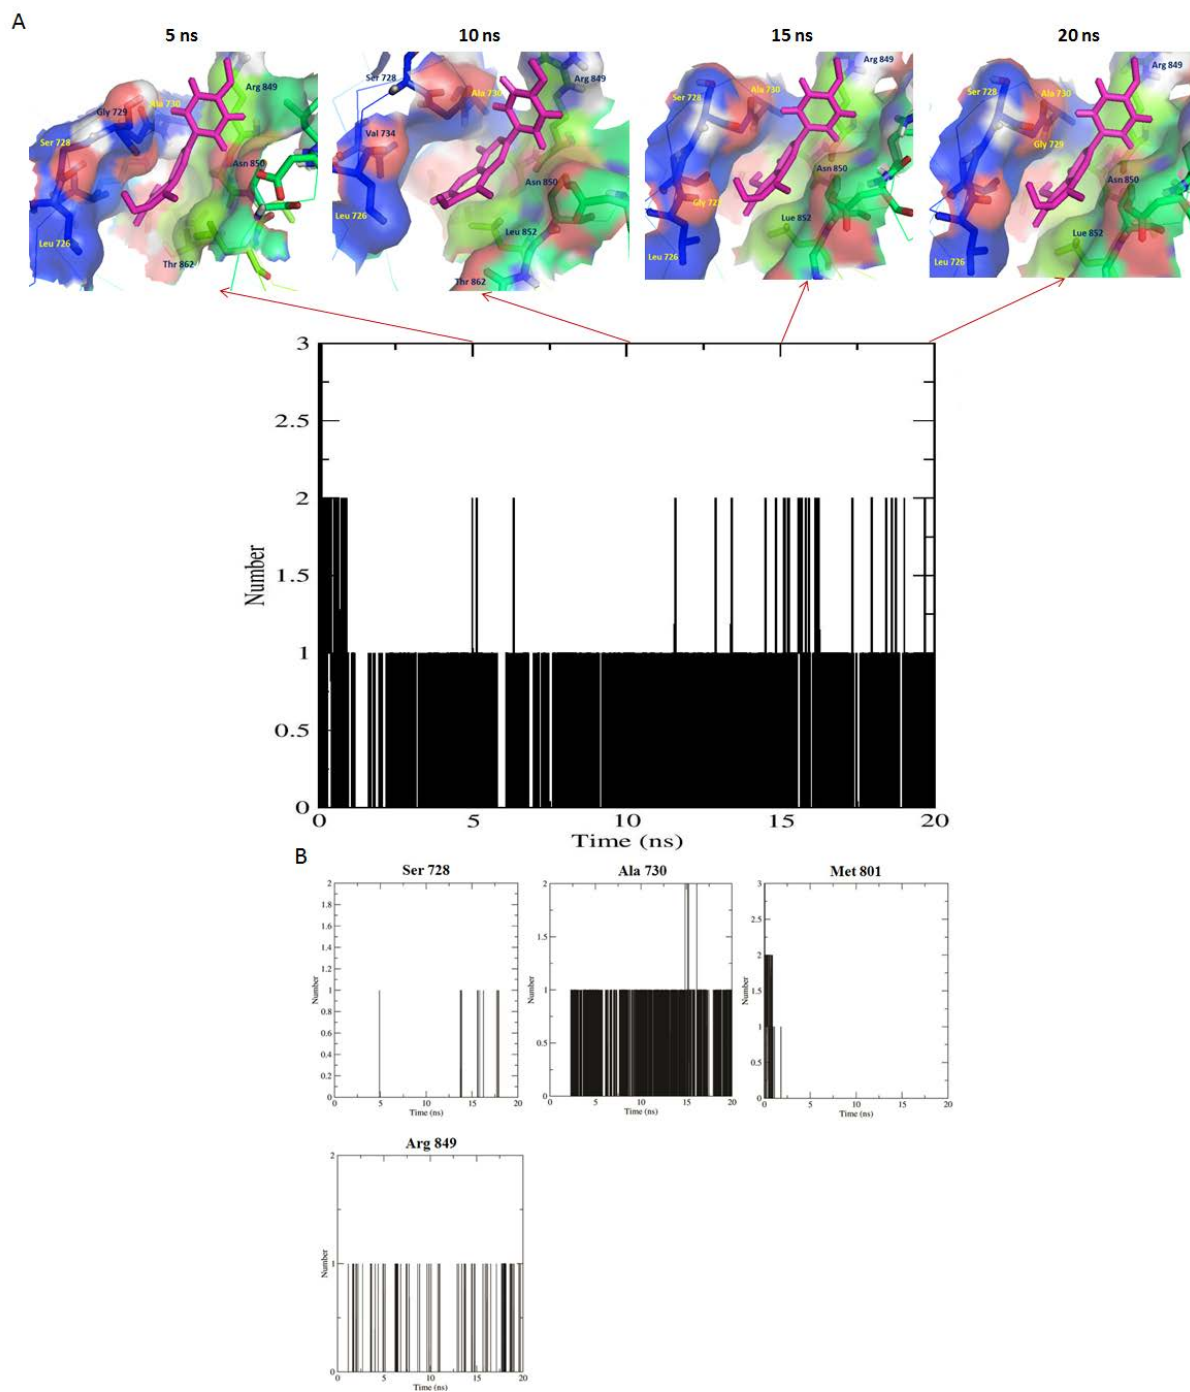

**Figure S1A.** The snapshots of docking pose of compound **1** and total H-bond intensity at various time scale intervals in 20 ns complex MD simulations with HER2, **B.**Hydrogen bonds diagram between compound **1** and active site residues viz., Ser728, Ala730, Met801 and Arg849 of HER2, Black squares indicate the presence of H-bond and white ones correspond to the absence of H-bond throughout the time scale of 20 ns MD simulations.

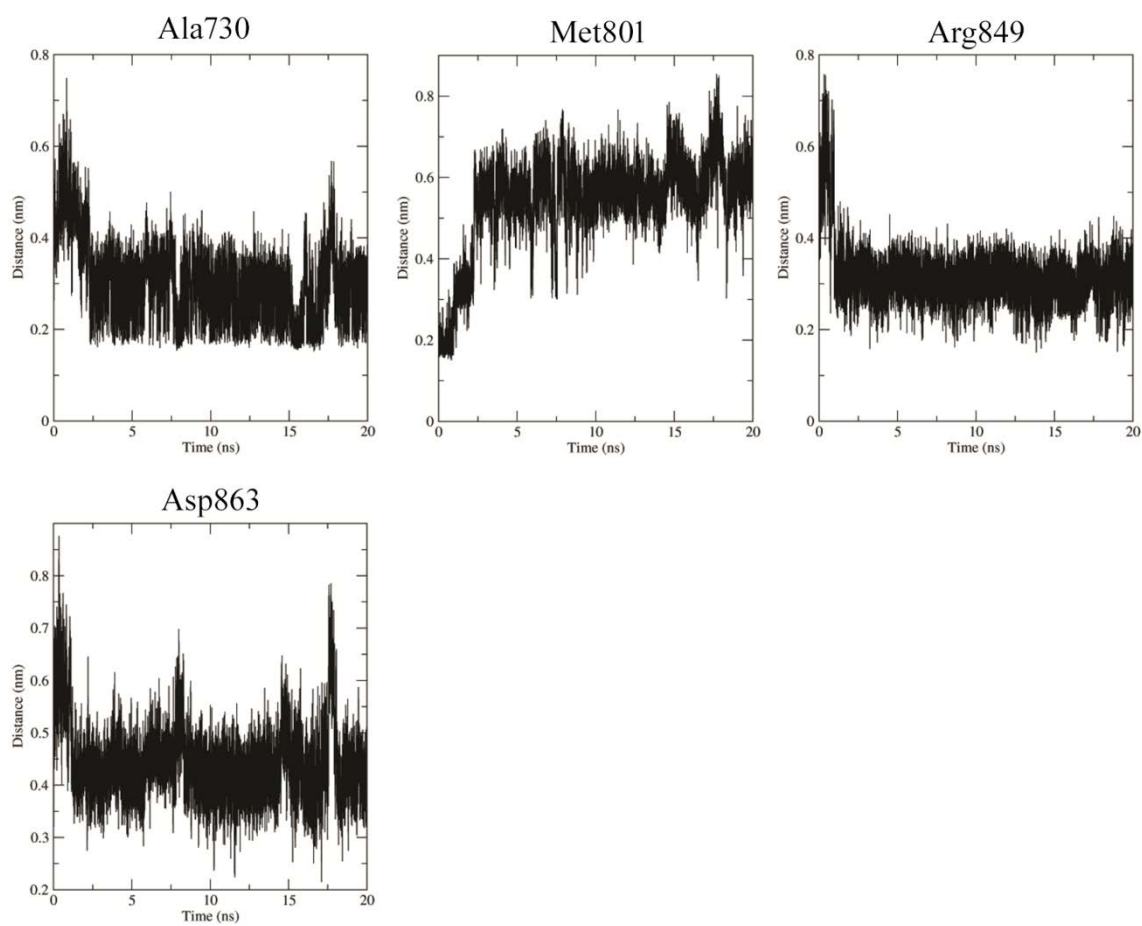

**Figure S2** Distance between hydrogen bonding residues viz., Ala 730, Met 801, Arg 849, and Asp 863 with compound **1** in a complex protein of HER2b, comparatively depicted throughout 20 ns simulation period.

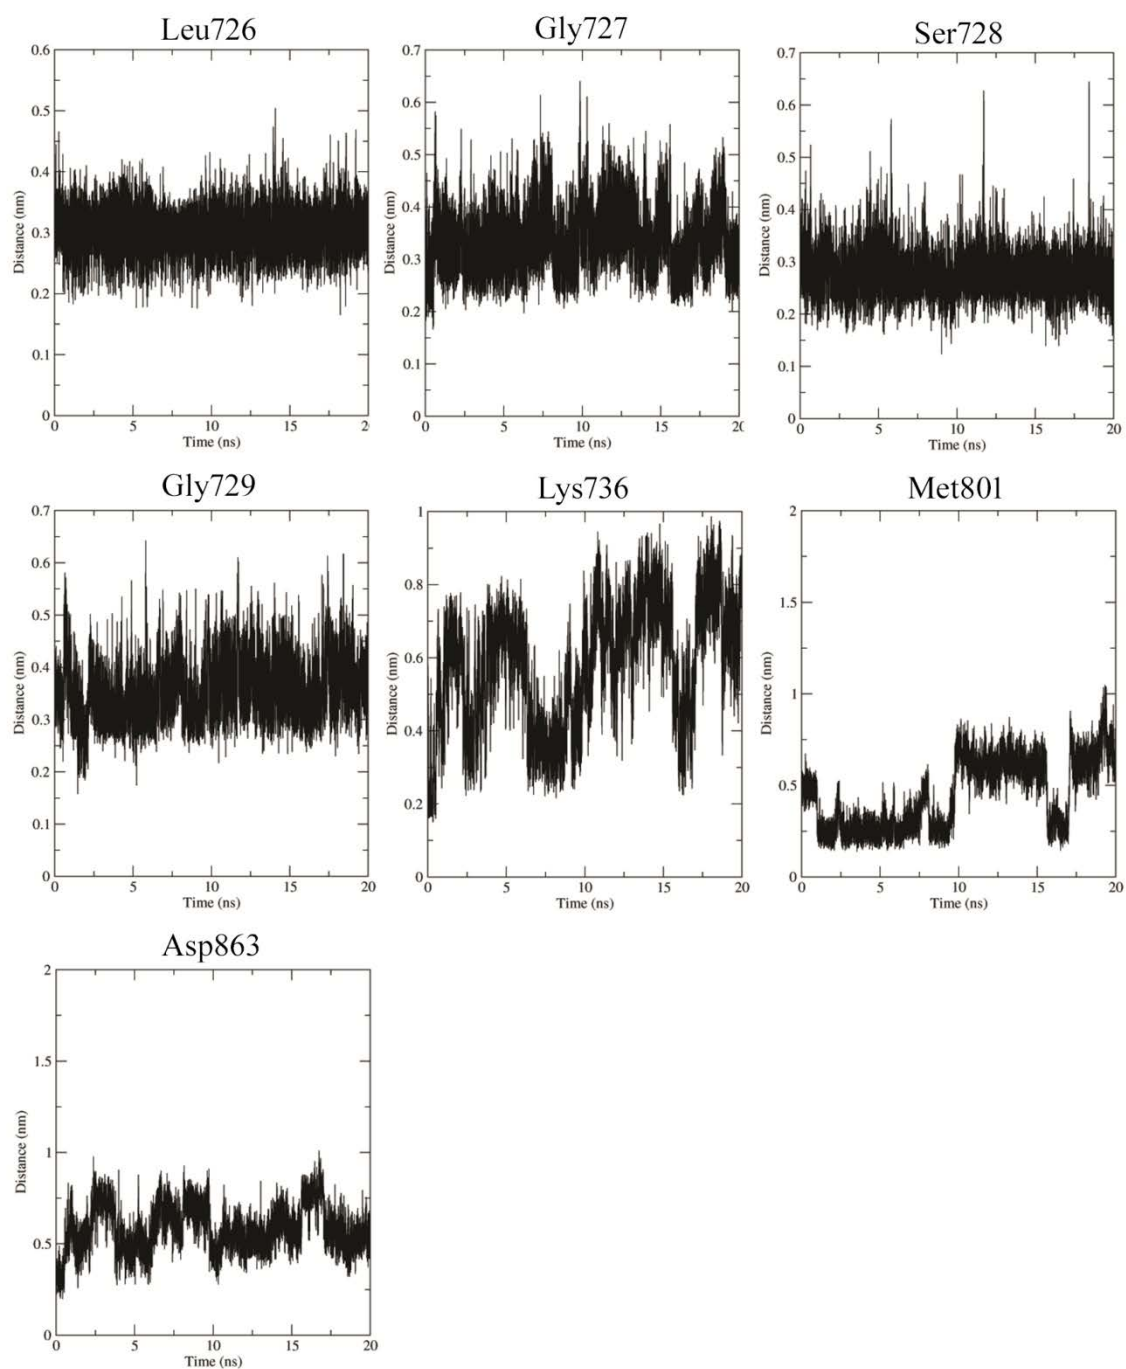

**Figure. S3**Distance between hydrogen bonding residues viz. Leu 726,Gly 727, Ser 728, Gly 729,Lys 736, Met 801, and Asp 863 with compound **2** in a complex protein of HER2c, comparatively depicted throughout 20 ns simulation period.

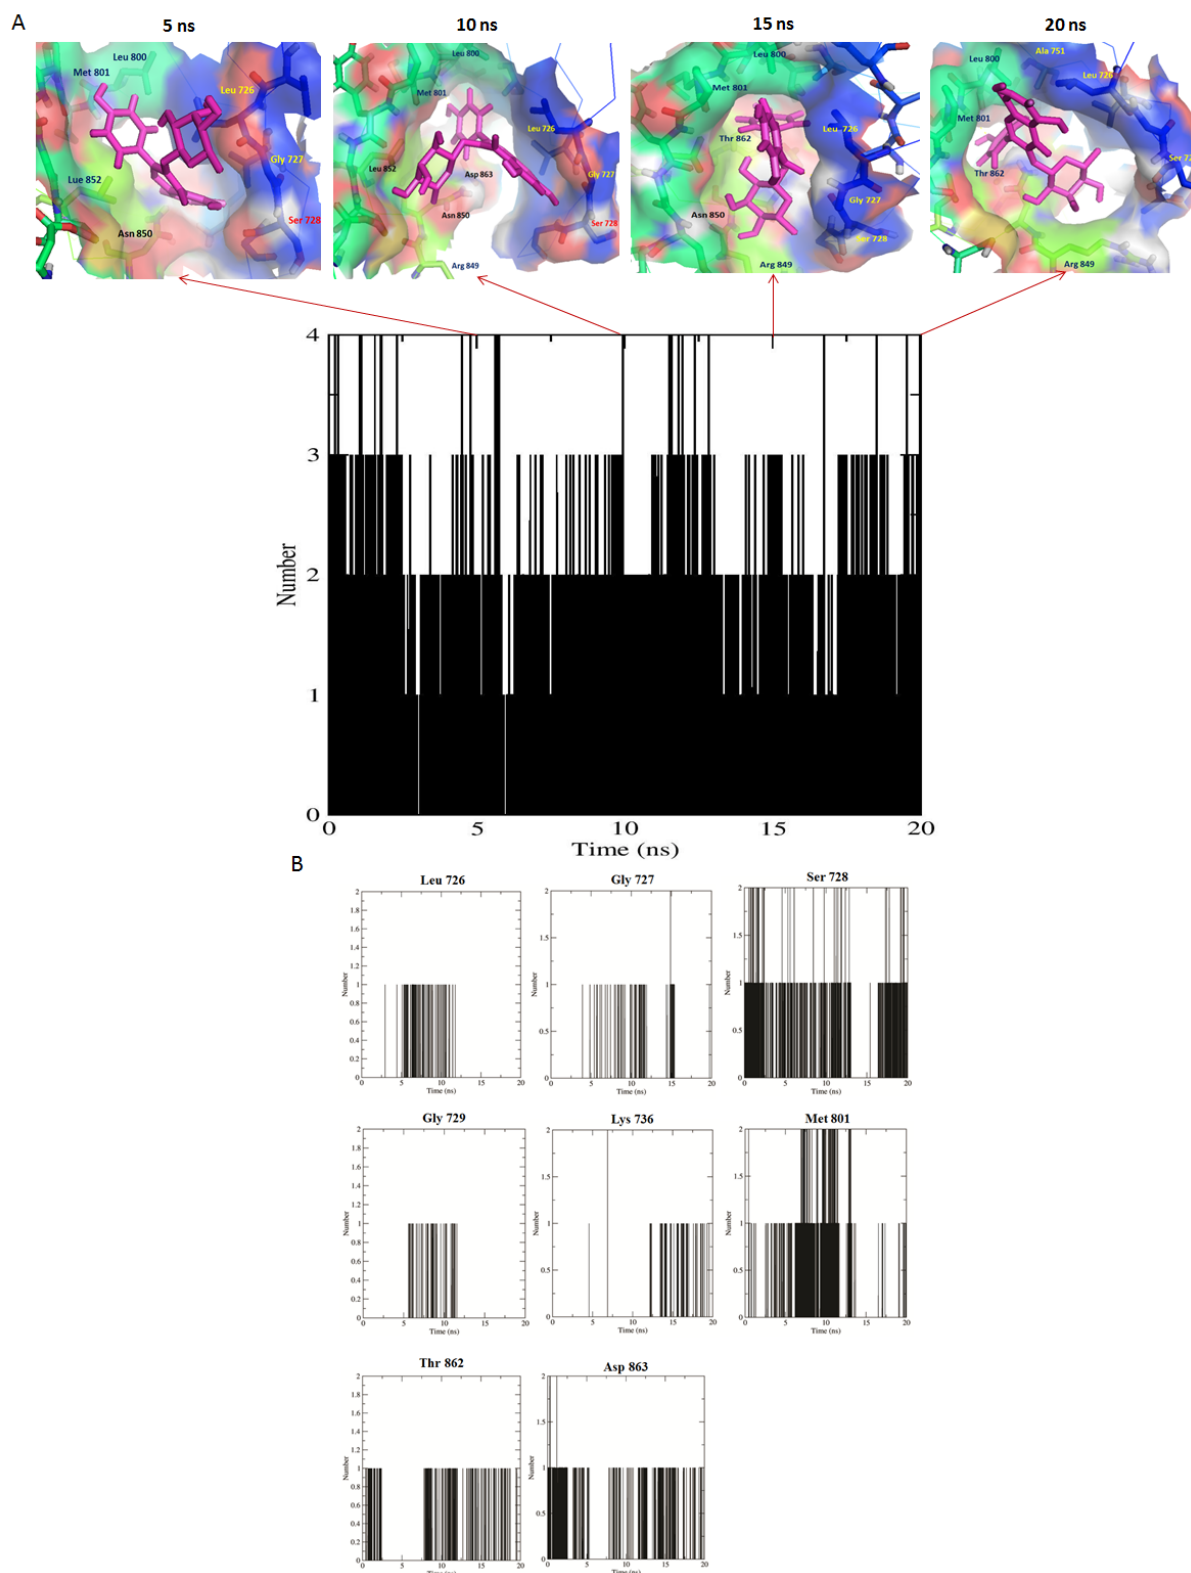

**Figure S4 A** The snapshots of docking pose of compound **3** and total H-bond intensity at various time scale intervals in 20 ns complex MD simulations with HER2, **B**. Hydrogen bonds diagram between compound **3** and active site residues viz., Leu726, Gly726, Ser728, Gly729, Lys736, Met801, Thr862 and Asp863 of HER2, Black squares indicate the presence of H-bond and white ones correspond to the absence of H-bond throughout the time scale of 20 ns MD simulations.

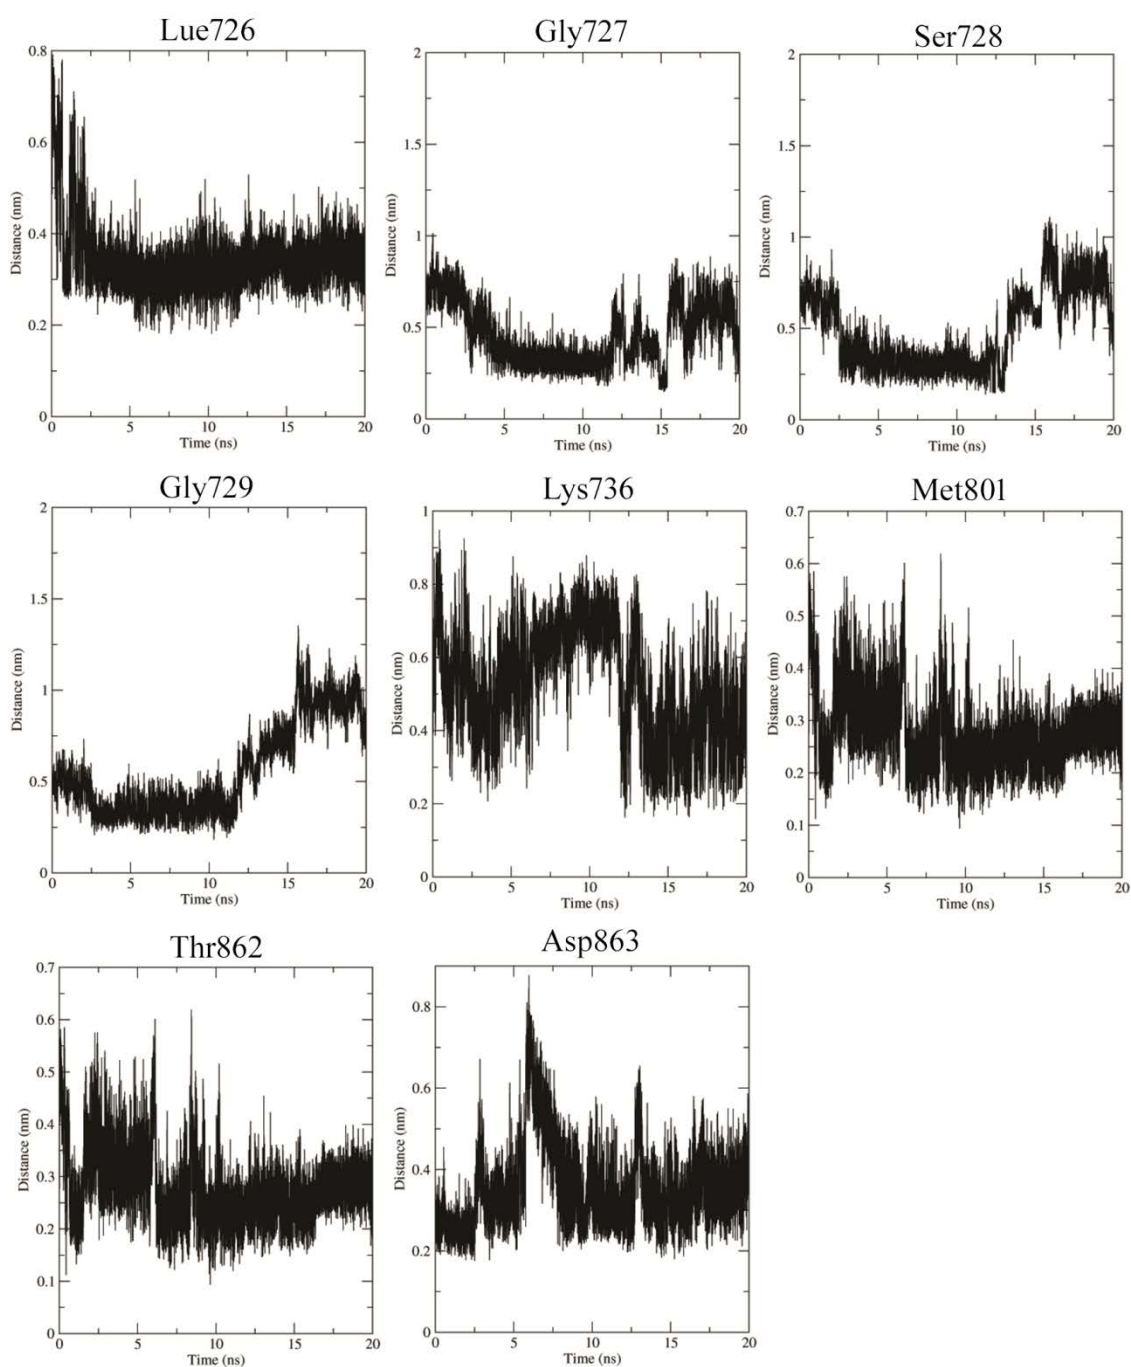

**Figure S5** Distance between hydrogen bonding residues viz. Leu 726, Gly 727, Ser 728, Gly 729, Lys 736, Met 801, Thr 862 and Asp 863 with compound **3** in a complex protein of HER2d, comparatively depicted throughout 20 ns simulation period.

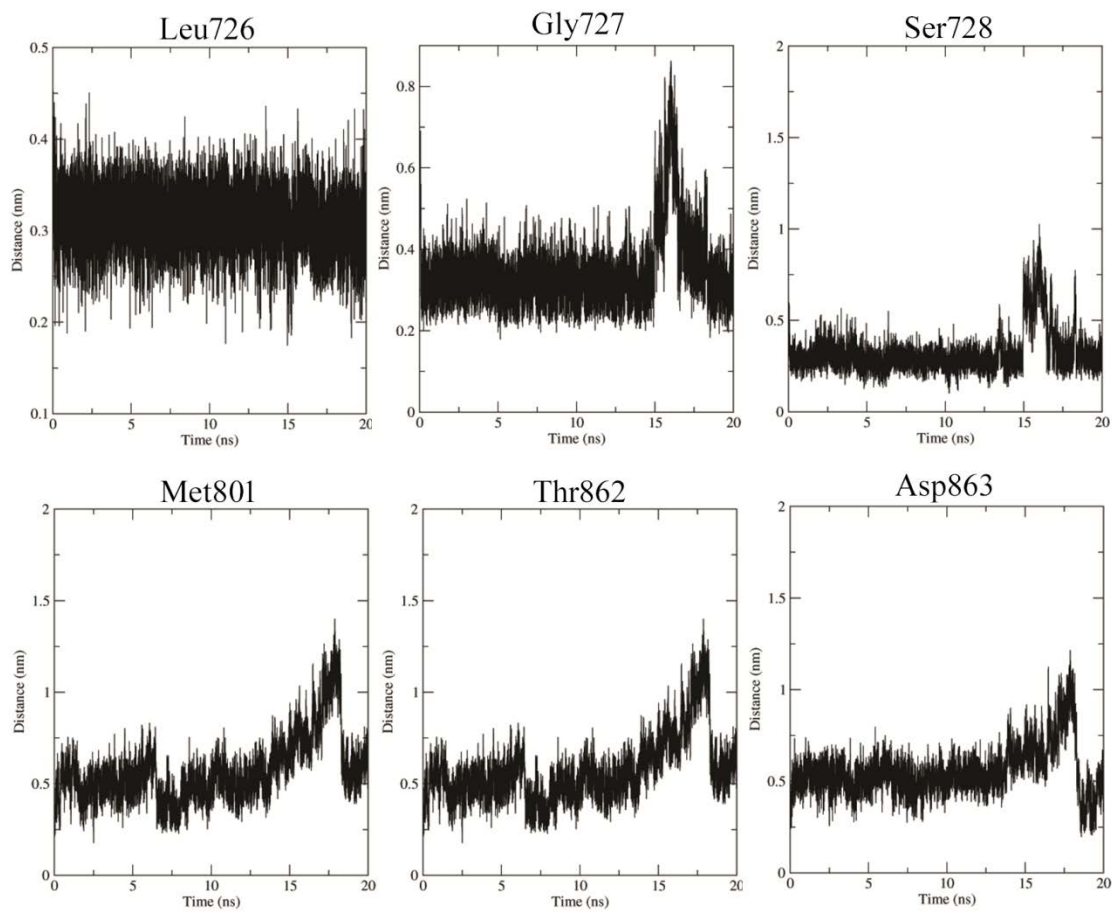

**Figure S6** Distance between hydrogen bonding residues viz. Leu 726, Gly 727, Ser 728, Met 801, Thr 862 and Asp 863 with ZINC67903192 in a complex protein of HER2e, comparatively depicted throughout 20 ns simulation period.

**Table S1**

The list of pharmacophore hits for HER2-Compound **2** complex and its physico-chemical properties.

| S.No | mol          | rmsd     | mseq | b_rotN | Weight  | a_acc | a_don | SlogP   |
|------|--------------|----------|------|--------|---------|-------|-------|---------|
| 1    | ZINC67903192 | 0.536928 | 1    | 6      | 594.522 | 14    | 9     | -1.5844 |
| 2    | ZINC67903197 | 0.582157 | 2    | 6      | 594.522 | 14    | 9     | -1.5844 |
| 3    | ZINC59763389 | 0.796897 | 3    | 5      | 564.496 | 13    | 8     | -0.9453 |
| 4    | ZINC59763395 | 0.783681 | 4    | 5      | 564.496 | 13    | 8     | -0.9453 |
| 5    | ZINC85816423 | 0.601657 | 5    | 9      | 772.662 | 20    | 13    | -4.0546 |
| 6    | ZINC85816425 | 0.601468 | 6    | 9      | 772.662 | 20    | 13    | -4.0546 |
| 7    | ZINC85816428 | 0.736348 | 7    | 9      | 772.662 | 20    | 13    | -4.0546 |
| 8    | ZINC85816432 | 0.736335 | 8    | 9      | 772.662 | 20    | 13    | -4.0546 |
| 9    | ZINC85507936 | 0.629833 | 9    | 7      | 626.52  | 16    | 11    | -2.9064 |
| 10   | ZINC85816022 | 0.582267 | 10   | 7      | 626.52  | 16    | 11    | -2.9064 |
| 11   | ZINC85816467 | 0.791578 | 11   | 10     | 788.661 | 21    | 14    | -5.0822 |
| 12   | ZINC85816470 | 0.650954 | 12   | 10     | 788.661 | 21    | 14    | -5.0822 |
| 13   | ZINC85815711 | 0.651054 | 13   | 6      | 596.494 | 15    | 10    | -2.2673 |
| 14   | ZINC85815706 | 0.582267 | 14   | 6      | 596.494 | 15    | 10    | -2.2673 |
| 15   | ZINC85816026 | 0.650954 | 15   | 7      | 626.52  | 16    | 11    | -2.9064 |
| 16   | ZINC85816347 | 0.751353 | 16   | 8      | 756.663 | 19    | 12    | -3.027  |
| 17   | ZINC85816374 | 0.823635 | 17   | 9      | 772.662 | 20    | 13    | -4.0546 |
| 18   | ZINC85816382 | 0.823287 | 18   | 9      | 772.662 | 20    | 13    | -4.0546 |
| 19   | ZINC85816460 | 0.581897 | 19   | 10     | 788.661 | 21    | 14    | -5.0822 |
| 20   | ZINC85816463 | 0.647945 | 20   | 10     | 788.661 | 21    | 14    | -5.0822 |
| 21   | ZINC59764808 | 0.797006 | 21   | 5      | 580.495 | 14    | 9     | -1.2397 |
| 22   | ZINC59764812 | 0.783414 | 22   | 5      | 580.495 | 14    | 9     | -1.2397 |
| 23   | ZINC85531791 | 0.526649 | 23   | 6      | 610.521 | 15    | 10    | -1.8788 |



| S.No | mol          | rmsd     | mseq | b_rotN | Weight  | a_acc | a_don | SlogP   |
|------|--------------|----------|------|--------|---------|-------|-------|---------|
| 24   | ZINC59766057 | 0.745063 | 24   | 5      | 596.494 | 15    | 10    | -1.5341 |
| 25   | ZINC59766065 | 0.742473 | 25   | 5      | 596.494 | 15    | 10    | -1.5341 |
| 26   | ZINC85948558 | 0.774123 | 26   | 7      | 610.521 | 15    | 9     | -1.9643 |
| 27   | ZINC85948547 | 0.774294 | 27   | 7      | 610.521 | 15    | 9     | -1.9643 |
| 28   | ZINC86048481 | 0.644746 | 28   | 8      | 656.546 | 17    | 11    | -2.8978 |
| 29   | ZINC86048475 | 0.644507 | 29   | 8      | 656.546 | 17    | 11    | -2.8978 |
| 30   | ZINC85931428 | 0.773715 | 30   | 9      | 670.573 | 17    | 10    | -2.5948 |
| 31   | ZINC85931420 | 0.77392  | 31   | 9      | 670.573 | 17    | 10    | -2.5948 |
| 32   | ZINC59764341 | 0.62403  | 32   | 10     | 607.497 | 12    | 8     | -1.8986 |
| 33   | ZINC59764345 | 0.62403  | 33   | 10     | 607.497 | 12    | 8     | -1.8986 |
| 34   | ZINC59585850 | 0.712897 | 34   | 4      | 464.379 | 11    | 8     | -0.7306 |

t
